# Supplementary material for: Effect of dynamic disorder on charge carrier dynamics in Ph4DP and Ph4DTP molecules
Source: Royal Society of Chemistry journal article supplement (doi:10.1039/c4ra15779f), 2015-01-01
Supplement: c4ra15779f1.pdf [file c4ra15779f1.pdf]

## Supplementary Information

### Effect of Dynamic Disorder on Charge Carrier Dynamics in

### Ph4DP and Ph4DTP Molecules

K. Navamani, and K. Senthilkumar\*

Department of Physics, Bharathiar University, Coimbatore-641 046

\*Corresponding author: [ksenthil@buc.edu.in](mailto:ksenthil@buc.edu.in)

**Fig. S1:** The optimized structure of Ph4DP and their derivatives and Ph4DTP molecules calculated at B3LYP/6-31G(d,p) level of theory.

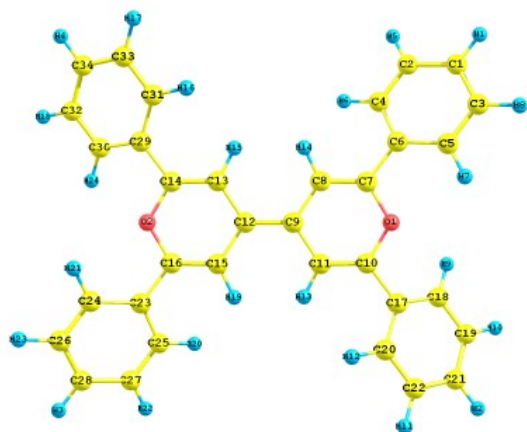

Ph4DP

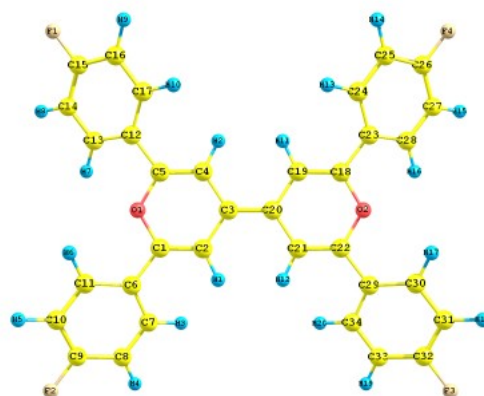

F-Ph4DP

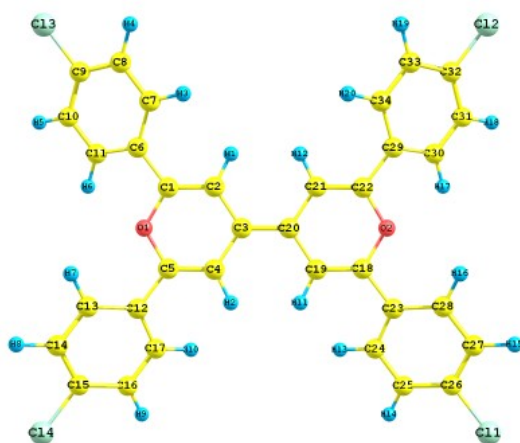

Cl-Ph4DP

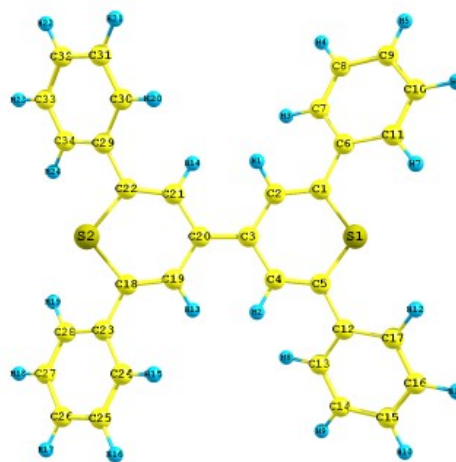

Ph4DTP

**Fig. S2:** Mean squared displacement of hole in Ph4DP, F-Ph4DP, Cl-Ph4DP and Ph4DTP molecules

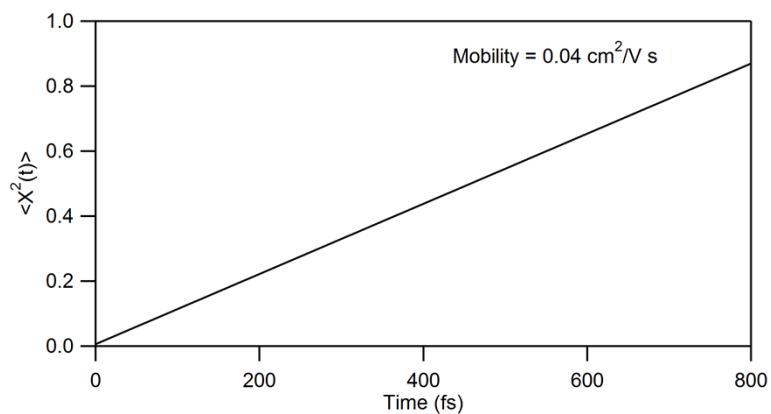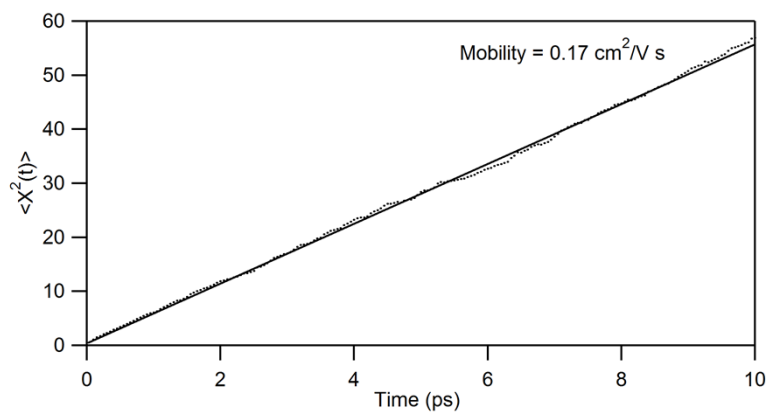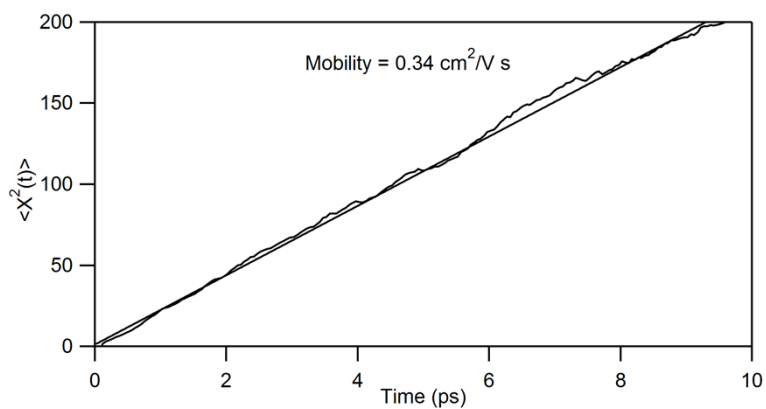

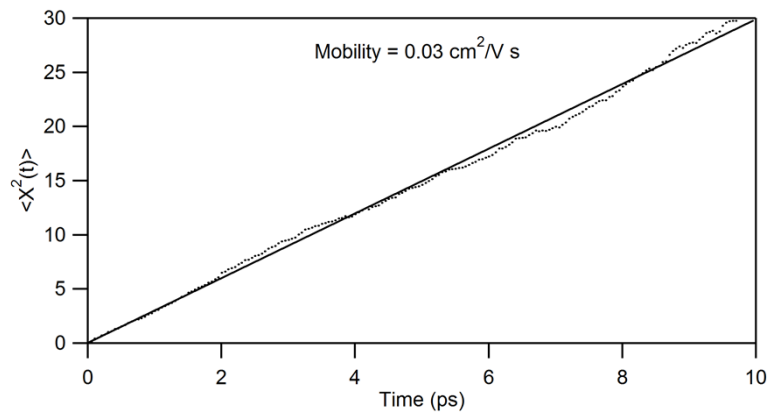

**Fig. S2:** Mean squared displacement of electron in Ph4DP, F-Ph4DP, Cl-Ph4DP and Ph4DTP molecules

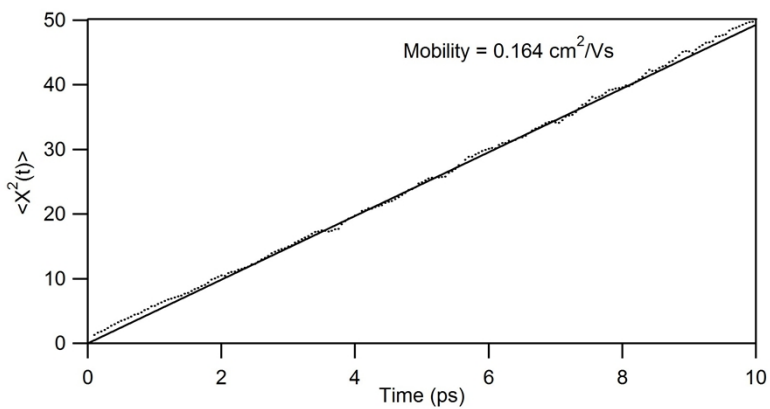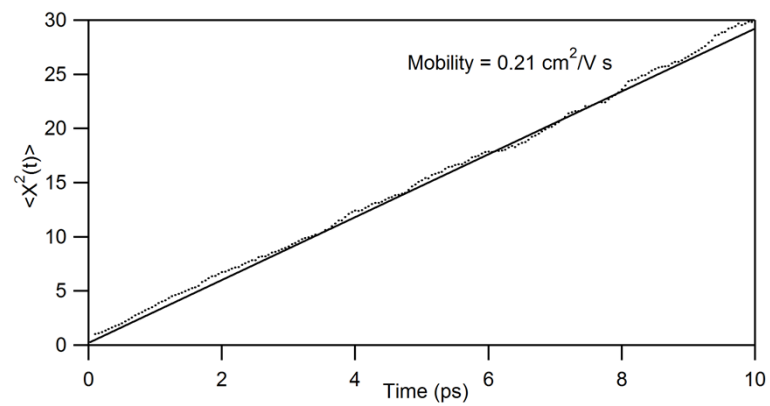

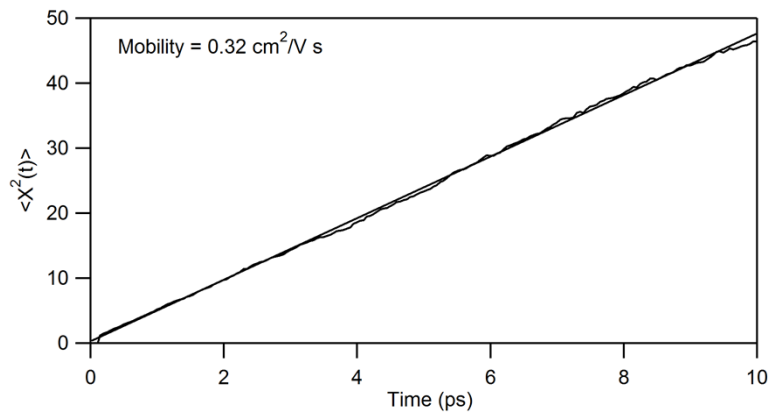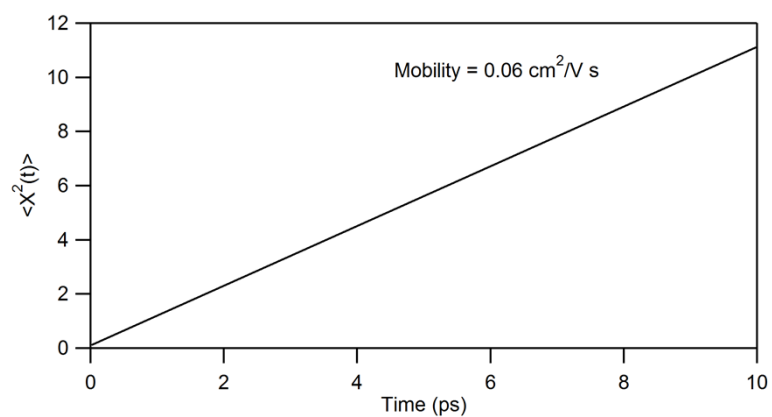

**Fig. S2:** Survival probability of positive charge in Ph4DP, F-Ph4DP, Cl-Ph4DP and Ph4DTP molecules with respect to time

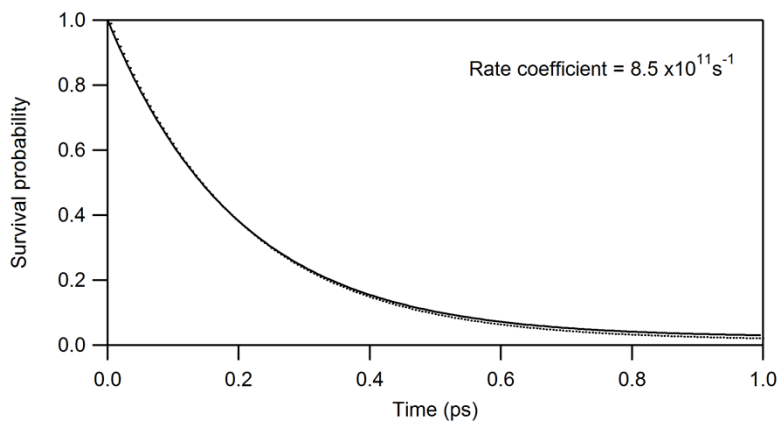

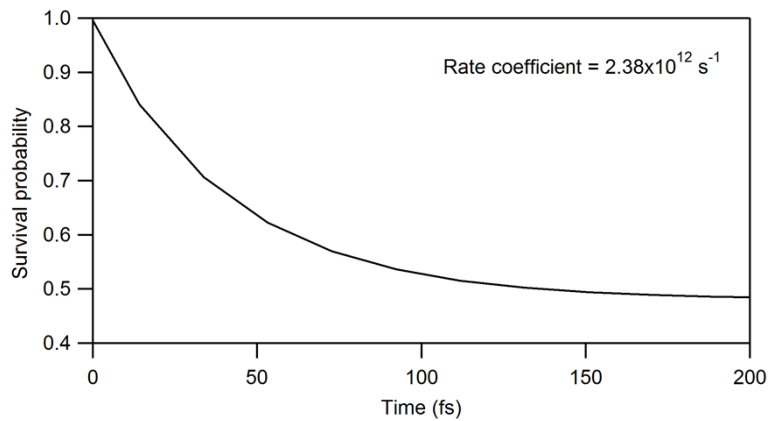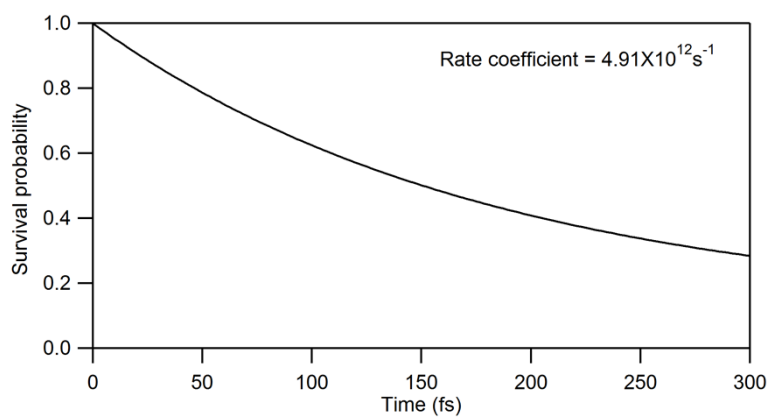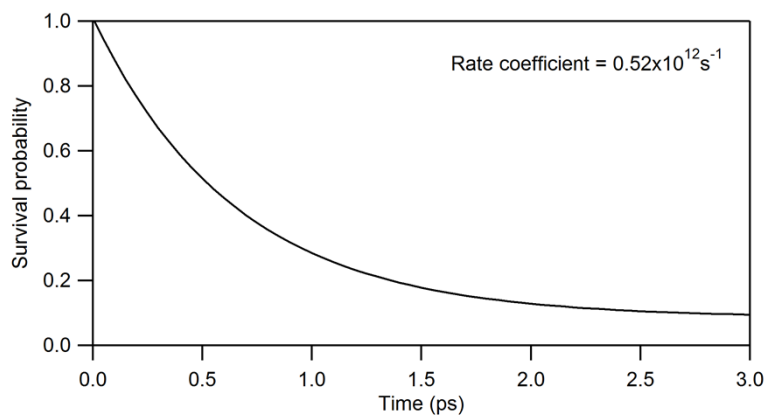

**Fig. S2:** Survival probability of negative charge in Ph4DP, F-Ph4DP, Cl-Ph4DP and Ph4DTP molecules with respect to time

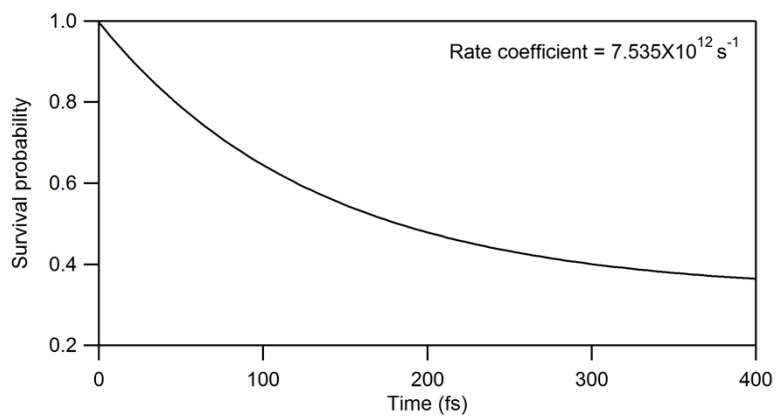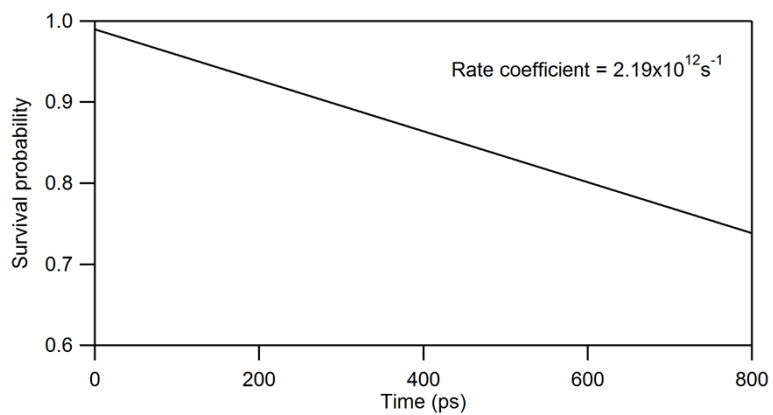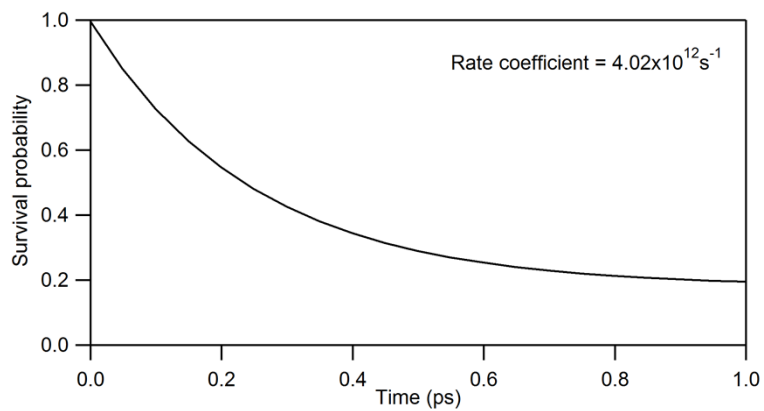

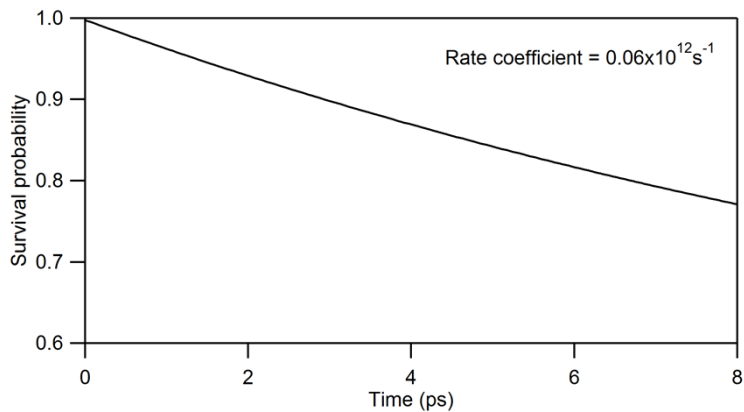

**Fig. S2:** Time evolution of the rate coefficient for hole transport in Ph4DP, F-Ph4DP, Cl-Ph4DP and Ph4DTP molecules

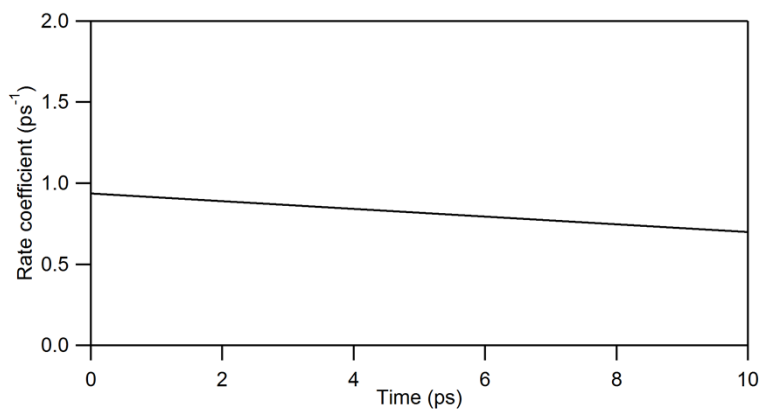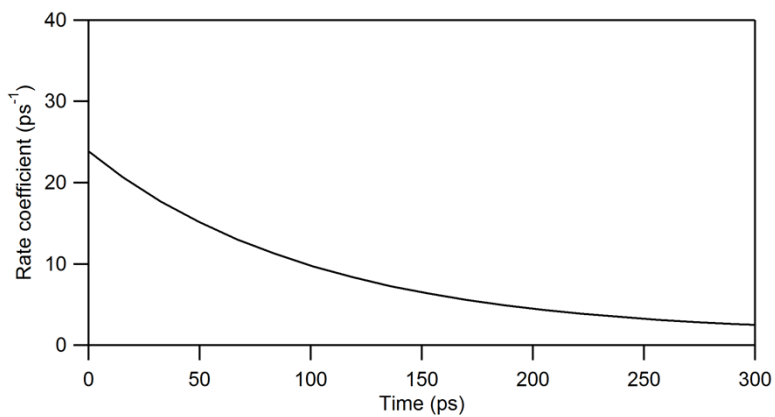



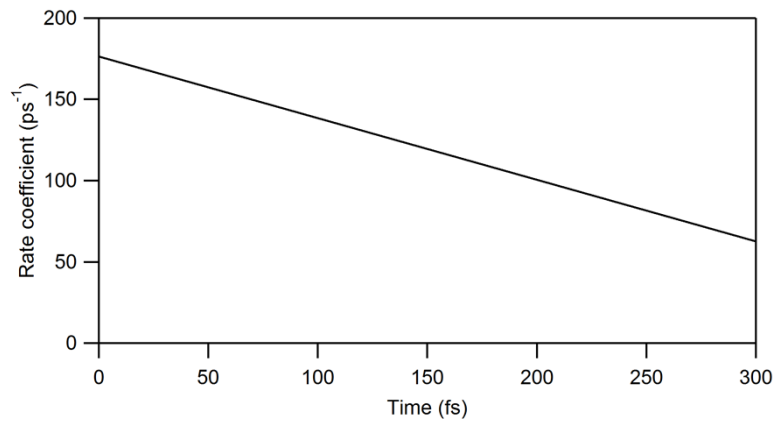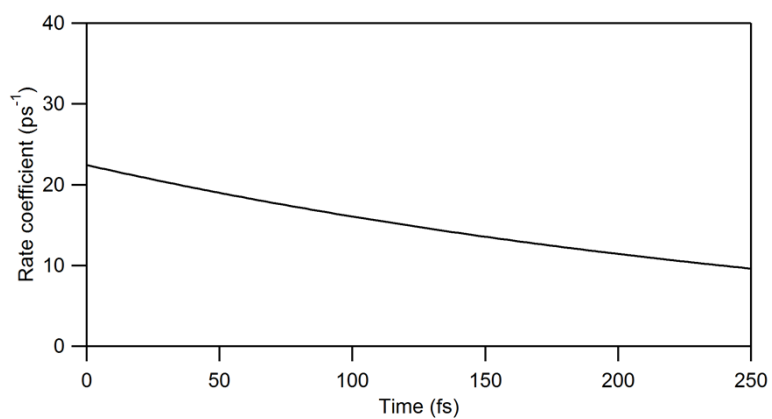

**Fig. S2:** Time evolution of the rate coefficient for electron transport in Ph4DP, F-Ph4DP, Cl-Ph4DP and Ph4DTP molecules

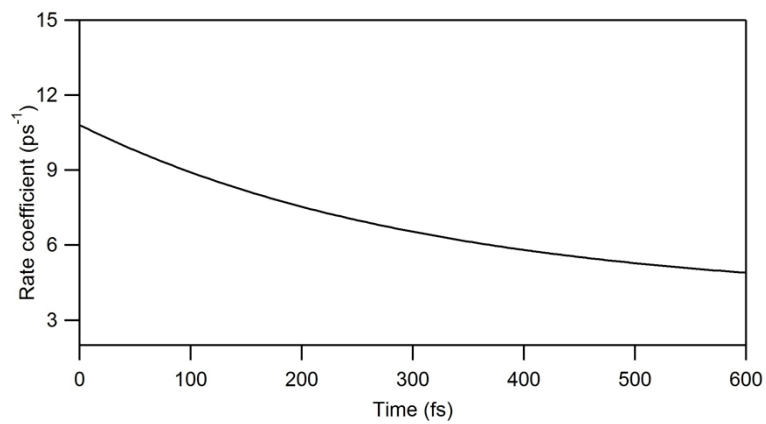

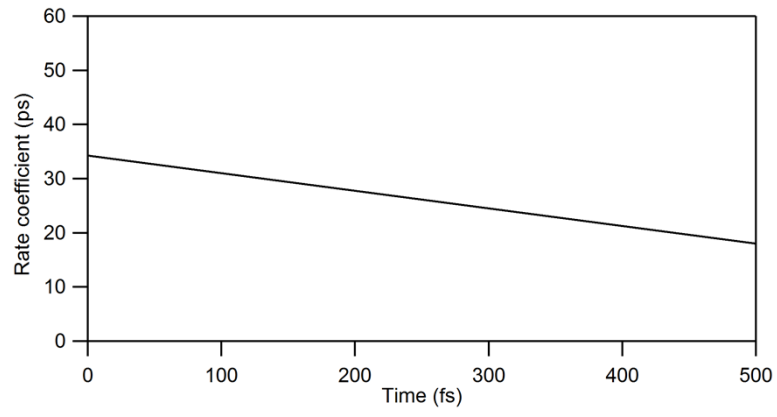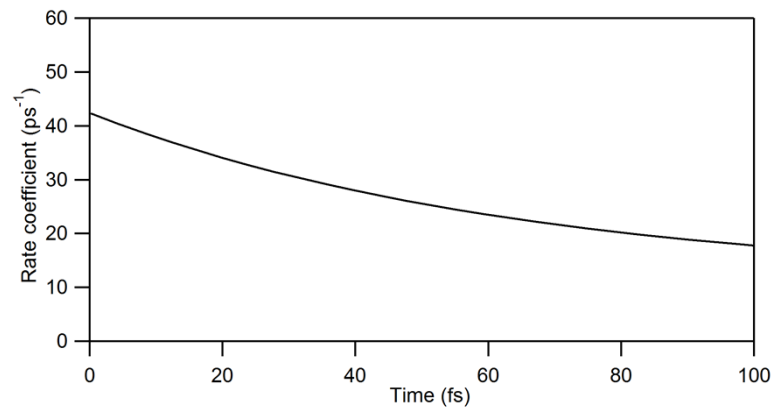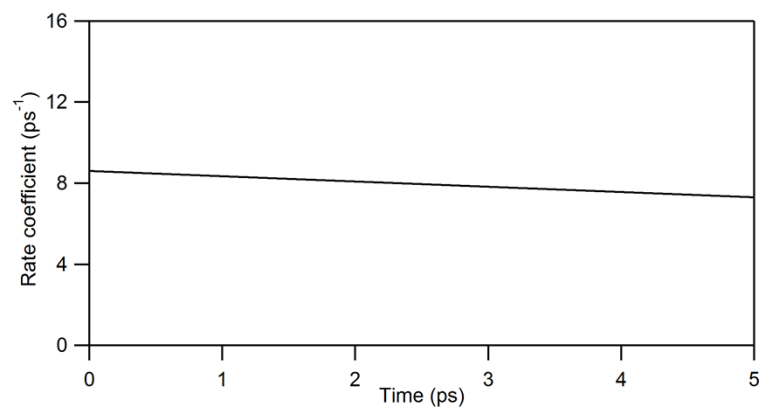

**Fig. S2:** Disorder drift with in time scale of simulation for hole transport in Ph4DP, F-Ph4DP, Cl-Ph4DP and Ph4DTP molecules

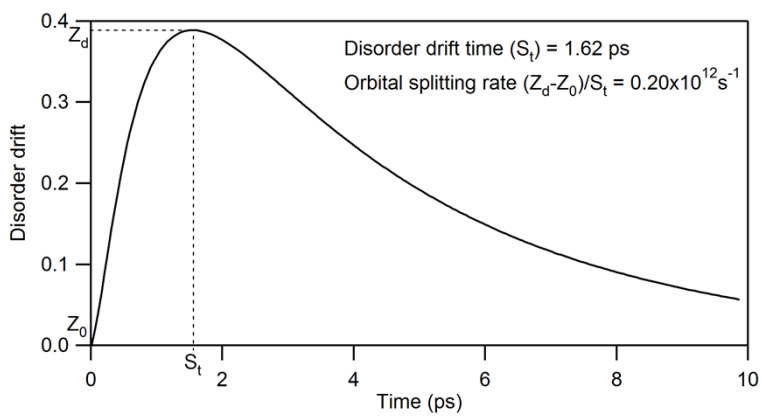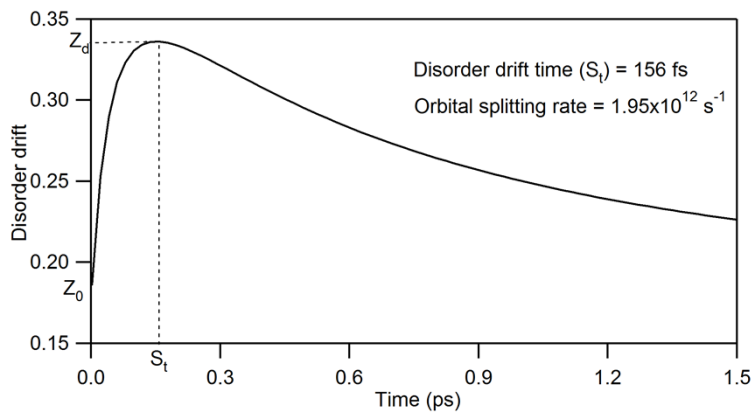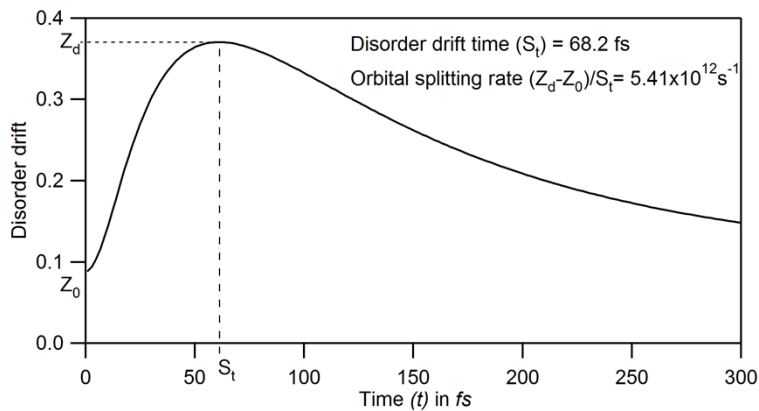

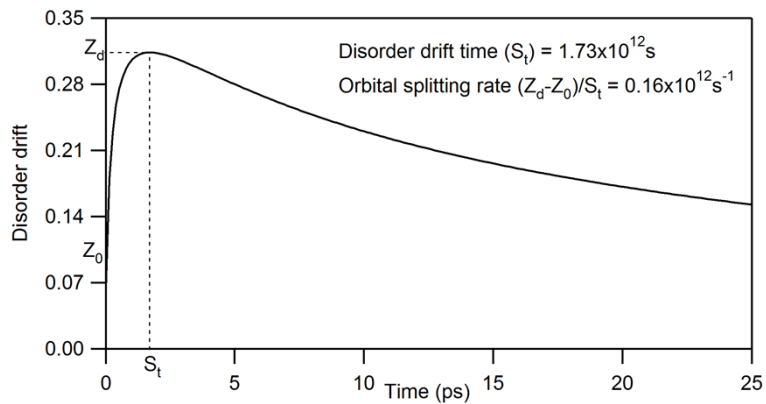

**Fig. S2:** Disorder drift with in time scale of simulation for electron transport in Ph4DP, F-Ph4DP, Cl-Ph4DP and Ph4DTP molecules

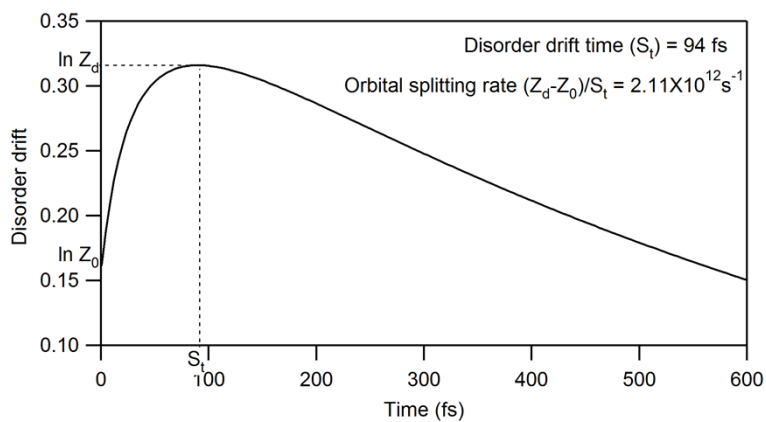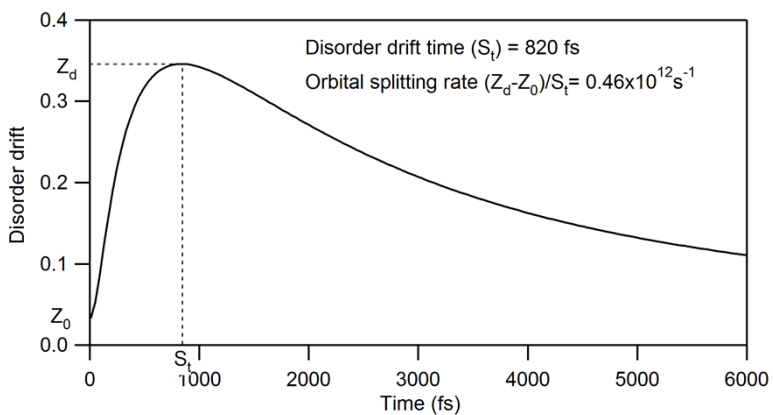

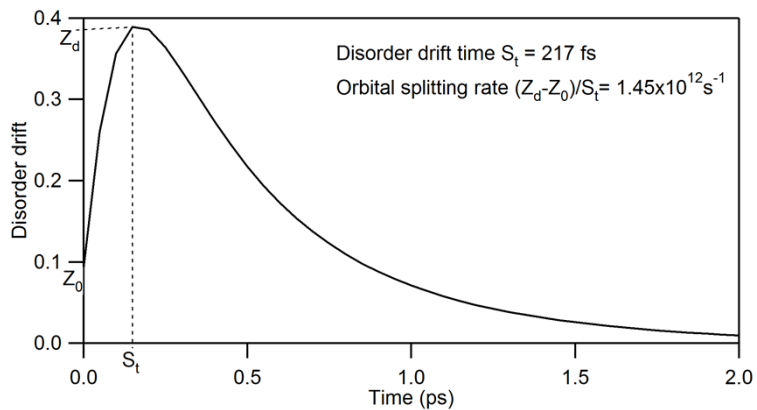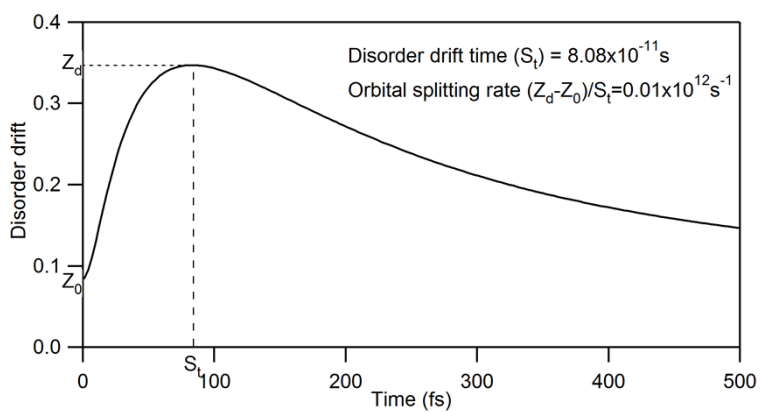

**Fig. S2:** Time evolution of dispersal energy difference ratio for hole transport in Ph4DP, F-Ph4DP, Cl-Ph4DP and Ph4DTP molecules

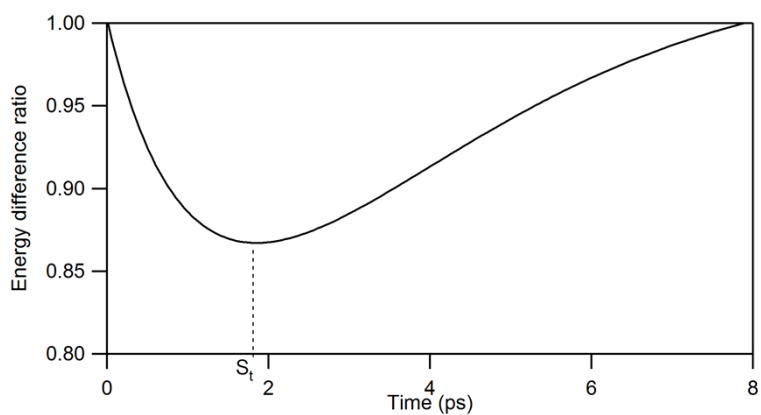

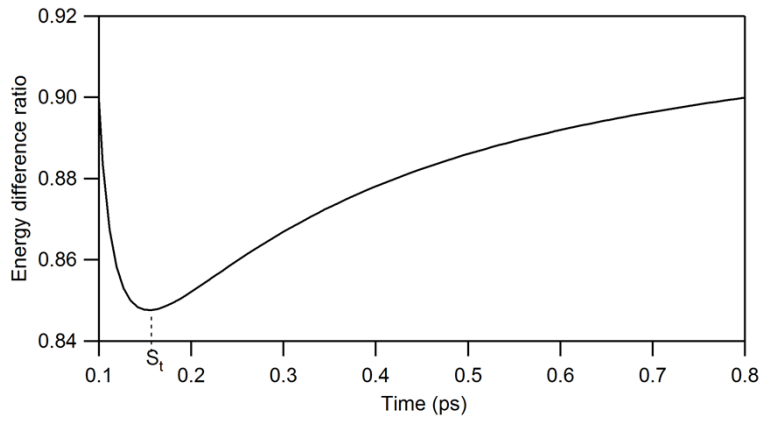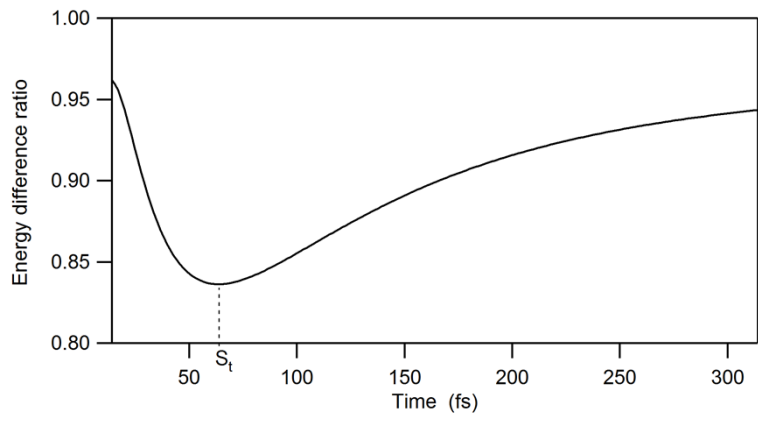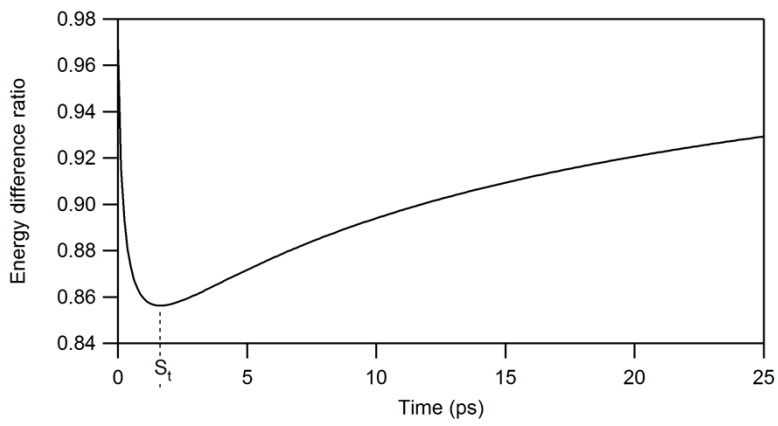

**Fig. S2:** Time evolution of dispersal energy difference ratio for electron transport in Ph4DP, F-Ph4DP, Cl-Ph4DP and Ph4DTP molecules

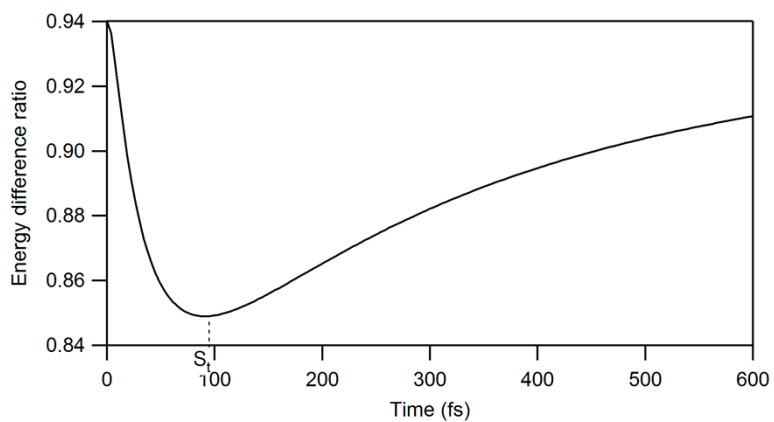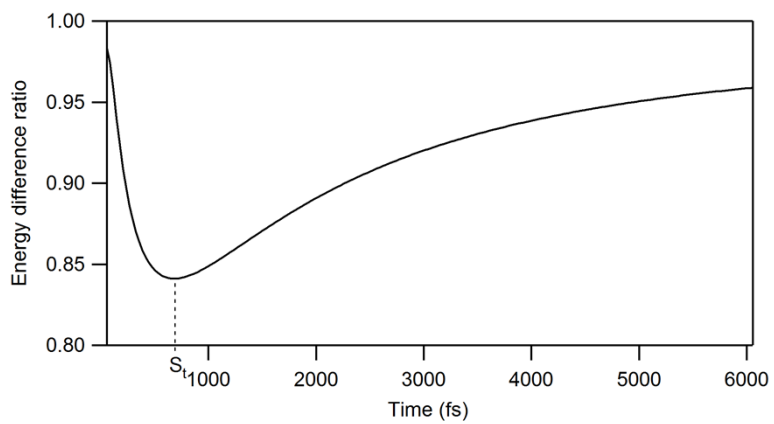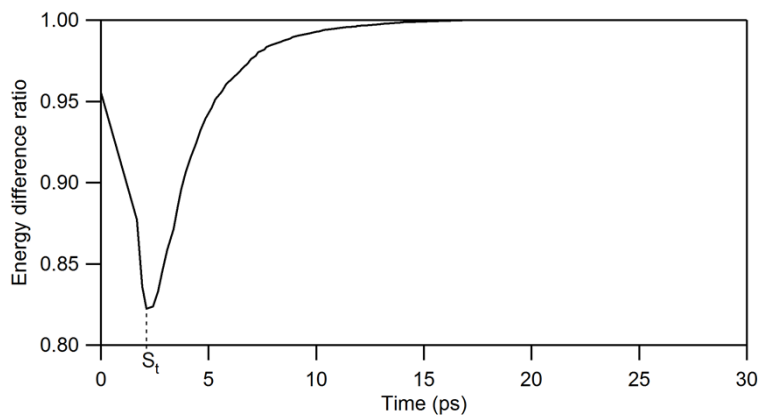

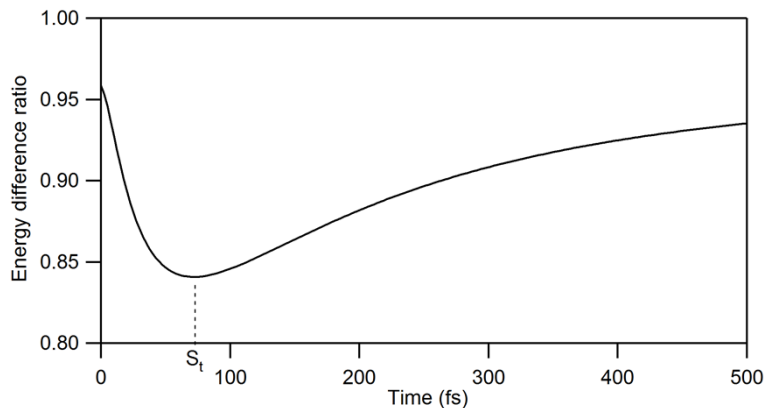

**Table S1. (a)** Calculated bond lengths for neutral, cationic and anionic geometries for the studied Ph4DP and Ph4DTP derivatives.

| Molecules | Atomic specification | Bond length in Å |                   |                  |
|-----------|----------------------|------------------|-------------------|------------------|
|           |                      | Neutral geometry | Cationic geometry | Anionic geometry |
| Ph4DP     | C3-C20               | 1.39             | 1.43              | 1.43             |
|           | O1-C5                | 1.38             | 1.36              | 1.40             |
|           | C5-C12               | 1.47             | 1.46              | 1.45             |
| F-Ph4DP   | C3-C20               | 1.39             | 1.44              | 1.43             |
|           | O1-C5                | 1.38             | 1.37              | 1.40             |
|           | C5-C12               | 1.47             | 1.46              | 1.45             |
|           | C15-F1               | 1.35             | 1.34              | 1.36             |
| Cl-Ph4DP  | C3-C20               | 1.39             | 1.44              | 1.42             |
|           | O1-C5                | 1.38             | 1.36              | 1.40             |
|           | C5-C12               | 1.47             | 1.46              | 1.45             |
|           | C15-Cl2              | 1.76             | 1.74              | 1.77             |
| Ph4DTP    | C3-C20               | 1.40             | 1.45              | 1.44             |
|           | S1-C5                | 1.78             | 1.75              | 1.80             |
|           | C5-C12               | 1.48             | 1.48              | 1.47             |



**Table S1. (b)** Calculated bond angles for neutral, cationic and anionic geometries for the studied Ph4DP and Ph4DTP derivatives.

| Molecules | Atomic specification | Bond angle ( $\theta$ ) in degree |                   |                  |
|-----------|----------------------|-----------------------------------|-------------------|------------------|
|           |                      | Neutral geometry                  | Cationic geometry | Anionic geometry |
| Ph4DP     | C3-C20-C19           | 123.44                            | 122.28            | 123.32           |
|           | O1-C5-C12            | 112.16                            | 113.21            | 112.55           |
|           | C4-C5-C12            | 126.39                            | 126.77            | 126.78           |
| F-Ph4DP   | C3-C20-C19           | 123.45                            | 122.28            | 123.34           |
|           | O1-C5-C12            | 112.02                            | 113.12            | 112.33           |
|           | C4-C5-C12            | 126.48                            | 126.87            | 126.92           |
| Cl-Ph4DP  | C3-C20-C19           | 123.42                            | 122.28            | 123.28           |
|           | O1-C5-C12            | 112.16                            | 113.13            | 112.48           |
|           | C4-C5-C12            | 126.39                            | 126.83            | 126.80           |
| Ph4DTP    | C3-C20-C19           | 121.67                            | 120.82            | 121.16           |
|           | S1-C5-C12            | 114.71                            | 114.94            | 116.70           |
|           | C4-C5-C12            | 126.39                            | 122.70            | 124.04           |

**Table S1. (c)** Calculated dihedral angle ( $\varphi$ ) in neutral, cationic and anionic geometries of the studied Ph4DP and Ph4DTP derivatives.

| Molecules | Atomic specification of adjacent rings | Torsion angle ( $\varphi$ ) in degree |                   |                  |
|-----------|----------------------------------------|---------------------------------------|-------------------|------------------|
|           |                                        | Neutral geometry                      | Cationic geometry | Anionic geometry |
| Ph4DP     | C4-C3-C20-C19                          | 0                                     | 0                 | 0                |
|           | C4-C5-C12-C17                          | 22.69                                 | 23.12             | 9.91             |
|           | O1-C5-C12-C13                          | 20.92                                 | 21.88             | 8.51             |
| F-Ph4DP   | C4-C3-C20-C19                          | 0.02                                  | 0                 | 0.03             |
|           | C4-C5-C12-C17                          | 23.38                                 | 22.83             | 10.72            |
|           | O1-C5-C12-C13                          | 21.57                                 | 21.56             | 9.16             |
| Cl-Ph4DP  | C4-C3-C20-C19                          | 0                                     | 0                 | 0                |
|           | C4-C5-C12-C17                          | 22.5                                  | 22.4              | 10               |
|           | O1-C5-C12-C13                          | 20.6                                  | 21.1              | 8.58             |
| Ph4DTP    | C4-C3-C20-C19                          | 4.4                                   | 2.75              | 10.23            |
|           | C4-C5-C12-C17                          | 142.5                                 | 141.65            | 155.62           |
|           | S1-C5-C12-C13                          | 141.35                                | 139.75            | 153              |

**Table S2:** Calculated effective charge transfer integral ( $J_{eff}$ , in eV) for hole and electron transport in Ph4DP and Ph4DTP molecules.

| $\theta$ (degrees) | $ J_{eff} $ (eV) |          |         |          |          |          |        |          |
|--------------------|------------------|----------|---------|----------|----------|----------|--------|----------|
|                    | Ph4DP            |          | F-Ph4DP |          | Cl-Ph4DP |          | Ph4DTP |          |
|                    | Hole             | Electron | Hole    | Electron | Hole     | Electron | Hole   | Electron |
| 12                 | 0.007            | 0.020    | 0.019   | 0.034    | 0.313    | 0.139    | 0.0    | 0.002    |
| 9                  | 0.009            | 0.029    | 0.044   | 0.035    | 0.202    | 0.071    | 0.006  | 0.001    |
| 6                  | 0.012            | 0.042    | 0.068   | 0.026    | 0.168    | 0.008    | 0.018  | 0.016    |
| 3                  | 0.017            | 0.062    | 0.089   | 0.003    | 0.092    | 0.018    | 0.028  | 0.053    |
| 0                  | 0.019            | 0.070    | 0.103   | 0.033    | 0.033    | 0.015    | 0.005  | 0.096    |
| -3                 | 0.002            | 0.096    | 0.106   | 0.083    | 0.004    | 0.014    | 0.112  | 0.077    |
| -6                 | 0.096            | 0.031    | 0.091   | 0.141    | 0.007    | 0.022    | 0.377  | 0.152    |
| -9                 | 0.120            | 0.020    | 0.054   | 0.200    | 0.008    | 0.010    | 0.624  | 0.630    |
| -12                | 0.122            | 0.013    | 0.013   | 0.248    | 0.010    | 0.008    | 0.401  | 0.530    |
